# Supplementary material for: Observation of two new conformers of neutral proline
Source: Royal Society of Chemistry journal article supplement (doi:10.1039/b904633j), 2009-01-01
Supplement: b904633j.pdf [file b904633j.pdf]

---

## Observation of Two New Conformers of Neutral Proline

---

Santiago Mata, Vanesa Vaquero, Carlos Cabezas, Isabel Peña, Cristóbal Pérez, Juan C. López and José L. Alonso\*

*Grupo de Espectroscopía Molecular (GEM), Departamento de Química Física y Química Inorgánica, Facultad de Ciencias, Universidad de Valladolid, E-47005 Valladolid, Spain. Fax: +34-983-423204; Tel: +34-983-423204; E-mail: [jclopez@qf.uva.es](mailto:jclopez@qf.uva.es), [jlalonso@qf.uva.es](mailto:jlalonso@qf.uva.es)*

**Table S1.** Observed frequencies and residuals (in MHz) for the nuclear quadrupole coupling hyperfine components of the conformer Ia of proline.

| J' | K' <sub>-1</sub> | K' <sub>+1</sub> | J'' | K'' <sub>-1</sub> | K'' <sub>+1</sub> | F' | F'' | V <sub>obs.</sub> | V <sub>obs.</sub> -V <sub>cal.</sub> |
|----|------------------|------------------|-----|-------------------|-------------------|----|-----|-------------------|--------------------------------------|
| 1  | 1                | 1                | 0   | 0                 | 0                 | 2  | 1   | 5234.652          | -0.003                               |
|    |                  |                  |     |                   |                   | 1  | 1   | 5235.198          | -0.007                               |
|    |                  |                  |     |                   |                   | 0  | 1   | 5233.830          | -0.003                               |
| 1  | 1                | 0                | 0   | 0                 | 0                 | 2  | 1   | 5447.920          | 0.006                                |
|    |                  |                  |     |                   |                   | 1  | 1   | 5446.632          | 0.006                                |
|    |                  |                  |     |                   |                   | 0  | 1   | 5449.849          | 0.001                                |
| 2  | 1                | 2                | 1   | 0                 | 1                 | 3  | 2   | 7989.551          | -0.004                               |
|    |                  |                  |     |                   |                   | 2  | 1   | 7990.192          | -0.005                               |
|    |                  |                  |     |                   |                   | 1  | 0   | 7989.896          | -0.002                               |
|    |                  |                  |     |                   |                   | 2  | 2   | 7990.935          | -0.001                               |
|    |                  |                  |     |                   |                   | 1  | 1   | 7988.045          | -0.004                               |
| 2  | 1                | 1                | 1   | 0                 | 1                 | 3  | 2   | 8628.853          | 0.003                                |
|    |                  |                  |     |                   |                   | 2  | 1   | 8627.528          | 0.005                                |
|    |                  |                  |     |                   |                   | 1  | 0   | 8630.291          | 0.003                                |
|    |                  |                  |     |                   |                   | 2  | 2   | 8628.265          | 0.002                                |
|    |                  |                  |     |                   |                   | 1  | 1   | 8628.441          | 0.003                                |
| 3  | 1                | 3                | 2   | 0                 | 2                 | 4  | 3   | 10643.643         | 0.004                                |
|    |                  |                  |     |                   |                   | 3  | 2   | 10644.428         | 0.004                                |
|    |                  |                  |     |                   |                   | 2  | 1   | 10643.541         | -0.003                               |
|    |                  |                  |     |                   |                   | 3  | 3   | 10645.306         | 0.003                                |
|    |                  |                  |     |                   |                   | 2  | 2   | 10642.180         | 0.002                                |
| 3  | 1                | 2                | 2   | 0                 | 2                 | 4  | 3   | 11921.258         | -0.003                               |
|    |                  |                  |     |                   |                   | 3  | 2   | 11920.005         | -0.003                               |
|    |                  |                  |     |                   |                   | 2  | 1   | 11921.878         | -0.003                               |
| 3  | 0                | 3                | 2   | 1                 | 2                 | 4  | 3   | 6778.803          | 0.001                                |
|    |                  |                  |     |                   |                   | 3  | 2   | 6778.463          | 0.000                                |
|    |                  |                  |     |                   |                   | 2  | 1   | 6779.204          | -0.001                               |
| 4  | 0                | 4                | 3   | 1                 | 3                 | 5  | 4   | 9935.335          | -0.001                               |
|    |                  |                  |     |                   |                   | 4  | 3   | 9934.907          | 0.001                                |
|    |                  |                  |     |                   |                   | 3  | 2   | 9935.600          | -0.001                               |

**Table S2.** Observed frequencies and residuals (in MHz) for the nuclear quadrupole coupling hyperfine components of the conformer Ib of proline.

| J' | K'_{-1} | K'_{+1} | J'' | K''_{-1} | K''_{+1} | F' | F'' | V <sub>obs.</sub> | V <sub>obs.</sub> -V <sub>cal.</sub> |
|----|---------|---------|-----|----------|----------|----|-----|-------------------|--------------------------------------|
| 1  | 1       | 1       | 0   | 0        | 0        | 2  | 1   | 5285.342          | -0.001                               |
|    |         |         |     |          |          | 1  | 1   | 5286.035          | -0.004                               |
|    |         |         |     |          |          | 0  | 1   | 5284.298          | -0.001                               |
| 1  | 1       | 0       | 0   | 0        | 0        | 2  | 1   | 5571.418          | 0.003                                |
|    |         |         |     |          |          | 1  | 1   | 5570.383          | 0.005                                |
|    |         |         |     |          |          | 0  | 1   | 5572.971          | -0.000                               |
| 2  | 1       | 2       | 1   | 0        | 1        | 3  | 2   | 7848.244          | -0.001                               |
|    |         |         |     |          |          | 2  | 1   | 7849.014          | -0.002                               |
|    |         |         |     |          |          | 1  | 0   | 7848.137          | -0.002                               |
|    |         |         |     |          |          | 2  | 2   | 7849.355          | -0.002                               |
| 2  | 1       | 1       | 1   | 0        | 1        | 1  | 1   | 7847.286          | -0.001                               |
|    |         |         |     |          |          | 3  | 2   | 8706.008          | 0.001                                |
|    |         |         |     |          |          | 2  | 1   | 8704.922          | 0.002                                |
|    |         |         |     |          |          | 1  | 0   | 8706.936          | 0.003                                |
|    |         |         |     |          |          | 2  | 2   | 8705.263          | 0.002                                |
| 3  | 1       | 3       | 2   | 0        | 2        | 4  | 3   | 10277.722         | 0.006                                |
|    |         |         |     |          |          | 3  | 2   | 10278.529         | 0.001                                |
|    |         |         |     |          |          | 2  | 1   | 10277.524         | -0.004                               |
|    |         |         |     |          |          | 3  | 3   | 10278.996         | 0.002                                |
|    |         |         |     |          |          | 2  | 2   | 10276.803         | 0.000                                |
| 3  | 0       | 3       | 2   | 1        | 2        | 4  | 3   | 6277.914          | -0.001                               |
|    |         |         |     |          |          | 3  | 2   | 6277.439          | -0.000                               |
|    |         |         |     |          |          | 2  | 1   | 6278.311          | 0.001                                |
| 3  | 1       | 2       | 2   | 0        | 2        | 4  | 3   | 11991.662         | -0.001                               |
|    |         |         |     |          |          | 3  | 2   | 11990.551         | -0.002                               |
|    |         |         |     |          |          | 2  | 1   | 11992.145         | -0.002                               |
| 4  | 0       | 4       | 3   | 1        | 3        | 5  | 4   | 9341.692          | -0.002                               |
|    |         |         |     |          |          | 4  | 3   | 9341.256          | -0.002                               |
|    |         |         |     |          |          | 3  | 2   | 9341.929          | 0.003                                |

**Table S3.** Spectroscopic constants for the observed conformers of proline.

|                     | <i>Ia</i>                  | <i>Ib</i>      | <i>IIa</i> <sup>a</sup> | <i>IIb</i> <sup>a</sup> |
|---------------------|----------------------------|----------------|-------------------------|-------------------------|
| $A^b$ [MHz]         | 3857.2400(14) <sup>c</sup> | 4003.9605(10)  | 3673.90038(148)         | 3923.5648(53)           |
| $B$ [MHz]           | 1590.45352(50)             | 1567.27215(37) | 1688.42056(56)          | 1605.87630(62)          |
| $C$ [MHz]           | 1377.50091(53)             | 1281.48910(38) | 1407.37716(55)          | 1279.79761(46)          |
| $\Delta_J$ [kHz]    | 1.116(21)                  | 1.110(15)      | 0.6341(89)              | 1.0198(105)             |
| $\Delta_{JK}$ [kHz] | -5.32(17)                  | -7.14(12)      | -2.402(47)              | -4.645(85)              |
| $\Delta_K$ [kHz]    | -                          | -              | 5.118(311)              | -0.0119(49)             |
| $\delta_J$ [kHz]    | -                          | -              | 0.1210(48)              | 0.2512(63)              |
| $\delta_K$ [kHz]    | -                          | -              | 0.581(214)              | [0.0]                   |
| $\chi_{aa}$ [MHz]   | 2.4664(32)                 | 1.1363(25)     | 0.8820(30)              | 0.0427(89)              |
| $\chi_{bb}$ [MHz]   | 1.8300(56)                 | 2.3208(32)     | -0.5493(44)             | -1.0822(116)            |
| $\chi_{cc}$ [MHz]   | -4.2964(56)                | -3.4571(32)    | -0.3327(44)             | 1.0394(116)             |
| $\sigma^d$ [kHz]    | 3.3                        | 2.4            | 1.9                     | 2.1                     |
| $N^e$               | 30                         | 29             | 110                     | 51                      |

<sup>a</sup>Data for conformers *IIa* and *IIb* taken from reference 3 of the paper.

<sup>b</sup> $A$ ,  $B$  and  $C$  are the rotational constants;  $\Delta_J$ ,  $\Delta_{JK}$ ,  $\Delta_K$ ,  $\delta_J$ ,  $\delta_K$  are the quartic centrifugal distortion constants.  $\chi_{aa}$ ,  $\chi_{bb}$ , and  $\chi_{cc}$  are <sup>14</sup>N nuclear quadrupole coupling tensor.

<sup>c</sup>Standard error in parenthesis in the units of the last digit.

<sup>d</sup>rms deviation of the fit.

<sup>e</sup>Number of components fitted.



**Table S4.** Ab initio spectroscopic constants for the low-energy conformers of proline.

| Theoretical <sup>a</sup>        | Ia     | Ib     | IIa    | IIb    | IIIa   | IIIb   |
|---------------------------------|--------|--------|--------|--------|--------|--------|
| $A^b$ / MHz                     | 3934.2 | 3948.9 | 3672.2 | 3976.9 | 3432.5 | 3409.7 |
| $B$ / MHz                       | 1560.2 | 1589.2 | 1698.7 | 1594.3 | 1791.7 | 1803.6 |
| $C$ / MHz                       | 1372.4 | 1306.5 | 1425.4 | 1276.7 | 1523.9 | 1502.2 |
| $\chi_{aa}$ / MHz               | 3.02   | 0.83   | 0.90   | 0.09   | 3.94   | -1.54  |
| $\chi_{bb}$ / MHz               | 1.99   | 2.75   | -0.80  | -1.32  | 0.93   | 2.56   |
| $\chi_{cc}$ / MHz               | -5.01  | -3.58  | -0.10  | 1.23   | -4.87  | -1.02  |
| $ \mu_a $ / D                   | 0.0    | 0.1    | 5.4    | 5.6    | 0.9    | 0.1    |
| $ \mu_b $ / D                   | 1.7    | 1.4    | 0.7    | 0.8    | 1.3    | 1.2    |
| $ \mu_c $ / D                   | 0.8    | 0.7    | 1.8    | 1.4    | 0.9    | 0.2    |
| $ \mu_{\text{total}} $ / D      | 1.9    | 1.5    | 5.7    | 5.8    | 1.9    | 1.2    |
| $\Delta E^c$ / $\text{cm}^{-1}$ | 782    | 745    | 0      | 268    | 1299   | 1214   |

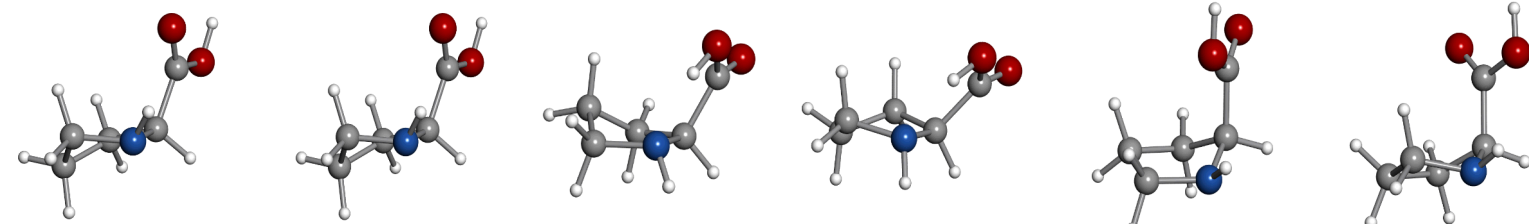

<sup>a</sup> Optimized structures at the MP2/6-311++G(d,p) level of calculation.

<sup>b</sup> A, B and C are the rotational constants;  $\mu_a$ ,  $\mu_b$  and  $\mu_c$  are the electric dipole moment components;  $\chi_{aa}$ ,  $\chi_{bb}$ , and  $\chi_{cc}$  are  $^{14}\text{N}$  nuclear quadrupole coupling parameters.

<sup>c</sup> Electronic energies relative to conformer Ia.
